# Supplementary material
Source: PubMed Central journal article supplement (PMC4359047)
Supplement: NIHMS650355-supplement-2.pdf [file NIHMS650355-supplement-2.pdf]

## **Supplemental Information**

Homeostatic control of memory cell progenitors in the NK cell lineage

Yosuke Kamimura and Lewis L. Lanier

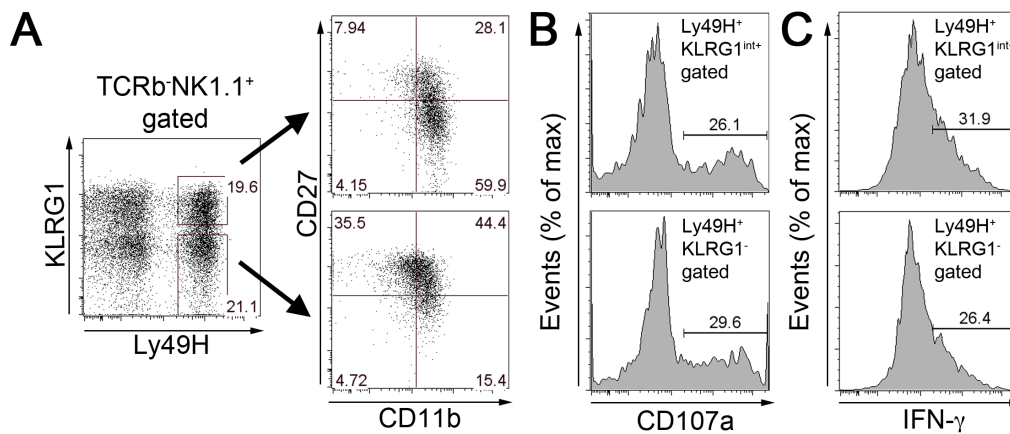

**Figure S1. Equivalent effector function between KLRG1<sup>int+</sup> and KLRG1<sup>-</sup> NK cells, related to Figure 1.**

(A) CD27 and CD11b expression by splenic naïve KLRG1<sup>int+</sup> and KLRG1<sup>-</sup> Ly49H<sup>+</sup> NK cells. (B) Degranulation by splenic naïve KLRG1<sup>int+</sup> (upper panel) and KLRG1<sup>-</sup> (lower panel) Ly49H<sup>+</sup> NK cells stimulated *ex vivo* with RMA-m157 target cells. (C) IFN- $\gamma$  production by splenic KLRG1<sup>int+</sup> (upper panel) and KLRG1<sup>-</sup> (lower panel) Ly49H<sup>+</sup> NK cells at day 1.5 after MCMV infection. Data are representative of two independent experiments.

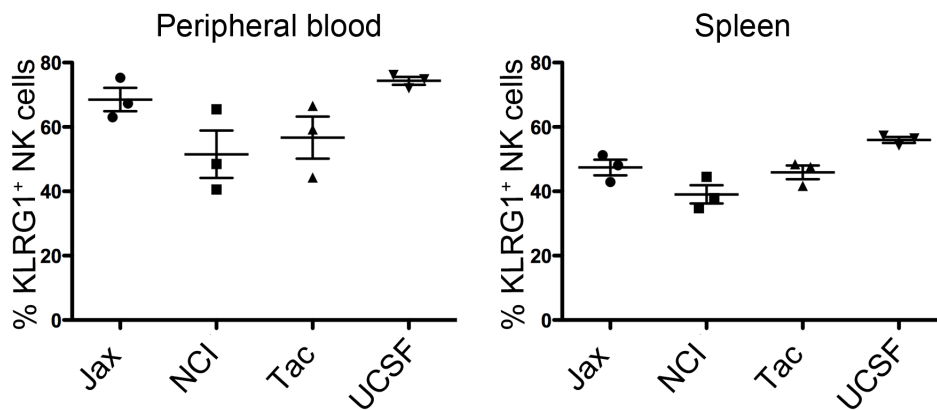

**Figure S2. Differential frequency of KLRG1<sup>int+</sup> NK cells in WT B6 mice from different animal vendors, related to Figure 2.**

Expression of KLRG1 on TCR $\beta$ <sup>-</sup> NK1.1<sup>+</sup> gated NK cells in peripheral blood (left panel) and spleen (right panel) of C57BL/6 mice purchased from the Jackson Laboratory (Jax), the NCI Mouse Repository, and Taconic (Tac) and C57BL/6 mice bred in our animal facility at UCSF. All mice were 8 week-old females. Data are representative of two independent experiments with 3 mice from each strain. Error bars show S.E.M.

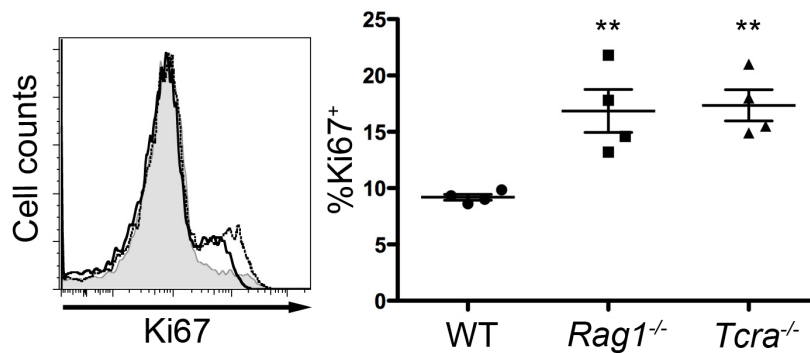

**Figure S3. Increased baseline proliferation of NK cells in T cell-deficient mice, related to Figure 3.**

Expression of Ki67 in splenic NK cells was detected by intracellular staining. A representative histogram plot (left panel; shaded: WT, bold: *Rag1*<sup>-/-</sup>, dotted: *Tcra*<sup>-/-</sup>) and graph summarizing results from individual mice (right panel) are shown. Data are representative of two independent experiments with 4 mice from each strain. Error bars show S.E.M.

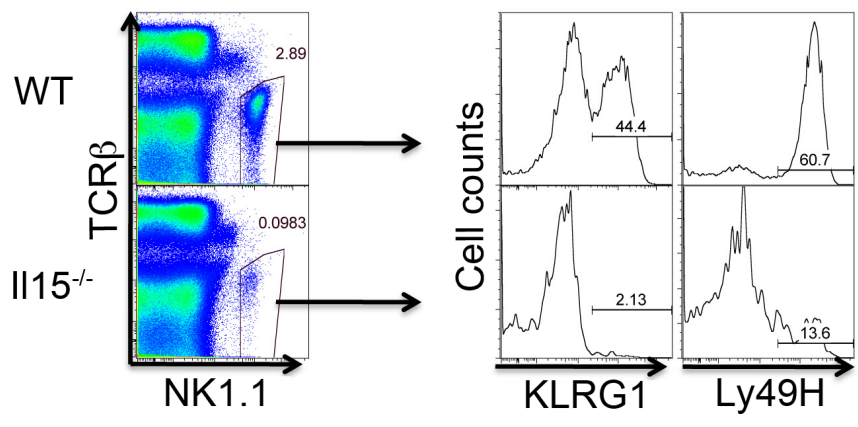

**Figure S4. Severely decreased frequency of KLRG1<sup>int+</sup> NK cells in *Il15*<sup>-/-</sup> mice, related of Figure 4.**

Expression of KLRG1 and Ly49H by splenic NK cells isolated from WT and *Il15*<sup>-/-</sup> mice. Percentage of TCRβ<sup>+</sup>NK1.1<sup>+</sup>, KLRG1<sup>+</sup>, or Ly49H<sup>+</sup> cells is shown in each panel. Data are representative of two independent experiments (n=4-6).

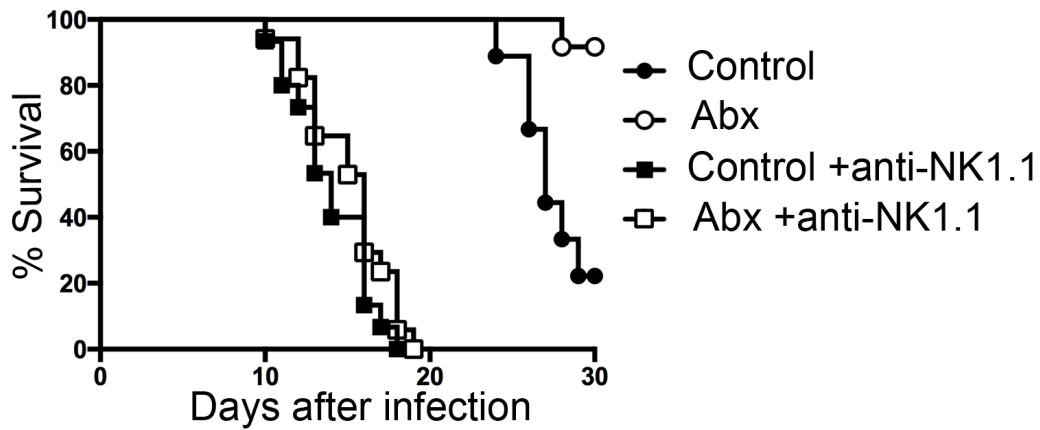

**Figure S5. Effect of antibiotics on the survival of NK cell-depleted *Rag1*<sup>-/-</sup> mice, related to Figure 6.**

*Rag1*<sup>-/-</sup> mice were treated with control or Abx-treated water for three weeks before MCMV infection (day 0) and treatment was continued throughout the experiment. Anti-NK1.1 antibody (200 µg/mouse) was injected i.p. one day before infection (day -1). Data are compiled from two independent experiments (control: n=10, Abx: n=12, control+anti-NK1.1: n=15, Abx + anti-NK1.1: n=17).

## **Supplemental Experimental Procedures**

### **Intracellular staining**

For the detection of IFN- $\gamma$ , splenocytes were isolated at day 1.5 after MCMV infection and stained for cell surface expression of TCR $\beta$  (H57-597; BioLegend), NK1.1 (PK136; BioLegend), Ly49H (3D10; eBioscience), and KLRG1 (2F1; BioLegend), followed by fixation with 4% paraformaldehyde in PBS for 10 min in room temperature. Cells were permeabilized by using Permeabilization Wash Buffer (BioLegend) and stained intracellularly for IFN- $\gamma$  (XMG1.2; BioLegend). For Ki67 staining, splenocytes were stained and fixed as described above. Cells were permeabilized with 0.1% Triton X-100 (Fisher Scientific) in PBS for 5 min at room temperature and then stained for Ki67 (B56; BD Biosciences). Samples were analyzed on a BD LSR II flow cytometer using FlowJo software (Tree Star).

### **Degranulation assays**

RMA target cells were transduced with a retroviral vector encoding MCMV 157 orf. Naive splenocytes ( $1 \times 10^6$ /well) were incubated for 6 hrs with target cells ( $1 \times 10^5$ /well) in the presence of monensin and anti-CD107a (1D4B; BD Biosciences). Cells were then collected, followed by surface staining with monoclonal antibodies to Ly49H, NK1.1, TCR $\beta$ , and KLRG1 (2F1; BioLegend).
